# Supplementary material for: Curcumin attenuates doxorubicin-induced cardiotoxicityviasuppressing oxidative stress and preventing mitochondrial dysfunction mediated by 14-3-3γ
Source: Royal Society of Chemistry journal article supplement (doi:10.1039/c8fo00466h), 2018-01-01
Supplement: c8fo00466h1.pdf [file c8fo00466h1.pdf]

**Curcumin attenuates doxorubicin-induced cardiotoxicity via  
suppressing oxidative stress and preventing mitochondrial dysfunction  
mediated by 14-3-3 $\gamma$**

Huan He<sup>1</sup>, Yong Luo<sup>2</sup>, Yang Qiao<sup>1</sup>, Zeyu Zhang<sup>3</sup>, Dong Yin<sup>3</sup>, Jianguo Yao<sup>4</sup>, Jiegen  
You<sup>4</sup>, Ming He<sup>1</sup>

Corresponding author: Jiegen You, M.D.

Jiangxi Academy of Medical Sciences

Nanchang University

E-mail: [yjg8316@163.com](mailto:yjg8316@163.com)

Ming He, Ph.D. & M.D.

Jiangxi Provincial Key Laboratory of Basic Pharmacology

Nanchang University School of Pharmaceutical Science

E-mail: [jxhm56@hotmail.com](mailto:jxhm56@hotmail.com)

**Supplementary materials**

**Fig. S1. Effects of Cur, pAD/14-3-3 $\gamma$ -shRNA, pAD/scrRNAi, or a combination of Cur with pAD/14-3-3 $\gamma$ -shRNA or pAD/scrRNAi on cell viability of cardiomyocytes unexposed to Dox, and effects of pretreatment with pAD/14-3-3 $\gamma$ -shRNA or pAD/scrRNAi on cell viability of cardiomyocytes exposed to Dox.** Cell viability did not change when using Cur alone (10  $\mu$ M), pAD/14-3-3 $\gamma$ -shRNA alone, pAD/scrRNAi alone, Cur+pAD/14-3-3 $\gamma$ -shRNA, and Cur+pAD/scrRNAi when compared with the control group ( $p>0.05$ ), or by using pAD/scrRNAi+Dox compared with Dox group ( $p>0.05$ ). However, the cell viability of pAD/14-3-3 $\gamma$ -shRNA+Dox was lower when compared to that of Dox alone ( $p<0.01$ ), indicating that 14-3-3 $\gamma$  could alleviate Dox-induced injury of cardiomyocytes. Values are expressed as the mean $\pm$ SEM for eight individual experiments. \*\* $p<0.01$  vs control group;  $\blacktriangle\blacktriangle p<0.01$  vs Dox group.

**Fig. S2. Effects of Cur, pAD/14-3-3 $\gamma$ -shRNA, pAD/scrRNAi, or a combination of Cur with pAD/14-3-3 $\gamma$ -shRNA or pAD/scrRNAi on LDH activities in culture media unexposed to Dox, and effects of pretreatment with pAD/14-3-3 $\gamma$ -shRNA or pAD/scrRNAi on LDH activities in culture mediums exposed to Dox.** The LDH activity did not change when using Cur alone (10  $\mu$ M), pAD/14-3-3 $\gamma$ -shRNA alone, pAD/scrRNAi alone, Cur+pAD/14-3-3 $\gamma$ -shRNA, and Cur+pAD/scrRNAi when compared with the control group ( $p>0.05$ ), or by using pAD/scrRNAi+Dox when compared with the Dox group ( $p>0.05$ ). However, the LDH activity of pAD/14-3-3 $\gamma$ -shRNA+Dox was higher when compared to that of Dox alone ( $p<0.01$ ). Values are expressed as the mean $\pm$ SEM for eight individual experiments. \*\* $p<0.01$ , vs control group;  $\blacktriangle\blacktriangle p<0.01$  vs Dox group.

**Fig. S3. Effects of Cur, pAD/14-3-3 $\gamma$ -shRNA, pAD/scrRNAi, or a combination of Cur with pAD/14-3-3 $\gamma$ -shRNA or pAD/scrRNAi on the expression of 14-3-3 $\gamma$  of cardiomyocytes unexposed to Dox, and effects of pretreatment with pAD/14-3-3 $\gamma$ -shRNA or pAD/scr RNAi on the expression of 14-3-3 $\gamma$  of the cardiomyocytes exposed to Dox.** The expression of 14-3-3 $\gamma$  in cardiomyocytes was upregulated using Cur alone (10  $\mu$ M) and Cur+pAD/scrRNAi when compared with the control group ( $p<0.01$ ). No changes were observed using pAD/scrRNAi+Dox when compared with the Dox group ( $p>0.05$ ) or by using pAD/scrRNAi alone compared with the control group ( $p>0.05$ ). However, the expression of 14-3-3 $\gamma$  was significantly downregulated using pAD/14-3-3 $\gamma$ -shRNA alone, Cur+pAD/14-3-3 $\gamma$ -shRNA, and pAD/14-3-3 $\gamma$ -shRNA+Dox when compared to that of the control group. From left to right, lane 1: Control; lane 2: Cur alone; lane 3: pAD/14-3-3 $\gamma$ -shRNA alone; lane 4: pAD/scrRNAi alone; lane 5: Cur+pAD/14-3-3 $\gamma$ -shRNA; lane 6: Cur+pADscr RNAi; lane 7: Dox; lane 8: pAD/14-3-3 $\gamma$ -shRNA+Dox; lane 9: pAD/scrRNAi+Dox. Values are expressed as fold changes over the level of  $\beta$ -actin and are presented as the mean $\pm$ SEM from five individual experiments. \*\* $p<0.01$ , vs control group;  $\blacktriangle\blacktriangle p<0.01$  vs Dox group.

**Fig. S4. Effects of Cur, pAD/14-3-3 $\gamma$ -shRNA, pAD/scrRNAi, or a combination of Cur with pAD/14-3-3 $\gamma$ -shRNA or pAD/scrRNAi on the expression of p-Bad (S112) of cardiomyocytes unexposed to Dox, and effects of pretreatment with pAD/14-3-3 $\gamma$ -shRNA or pAD/scrRNAi on the expression of p-Bad(S112) of cardiomyocytes exposed to Dox.** The expression of p-Bad(S112) in cardiomyocytes was upregulated using Cur alone (10  $\mu$ M) and Cur+pAD/scrRNAi when compared with the control

group ( $p < 0.01$ ). No changes were observed using pAD/scrRNAi+Dox when compared with the Dox group ( $p > 0.05$ ) or by using pAD/scrRNAi alone compared with the control group ( $p > 0.05$ ). However, the expression of p-Bad(S112) was significantly downregulated using pAD/14-3-3 $\gamma$ -shRNA alone, Cur+pAD/14-3-3 $\gamma$ -shRNA, and pAD/14-3-3 $\gamma$ -shRNA+Dox when compared to that of the control group. From left to right, lane 1: Control; lane 2: Cur alone; lane 3: pAD/14-3-3 $\gamma$ -shRNA alone; lane 4: pAD/scrRNAi alone; lane 5: Cur+pAD/14-3-3 $\gamma$ -shRNA; lane 6: Cur+pADscrRNAi; lane 7: Dox; lane 8: pAD/14-3-3 $\gamma$ -shRNA+Dox; lane 9: pAD/scrRNAi+Dox. Values are expressed as fold changes over the level of  $\beta$ -actin and are presented as the mean $\pm$ SEM from five individual experiments. \*\* $p < 0.01$ , vs control group;  $\blacktriangle\blacktriangle p < 0.01$  vs Dox group.

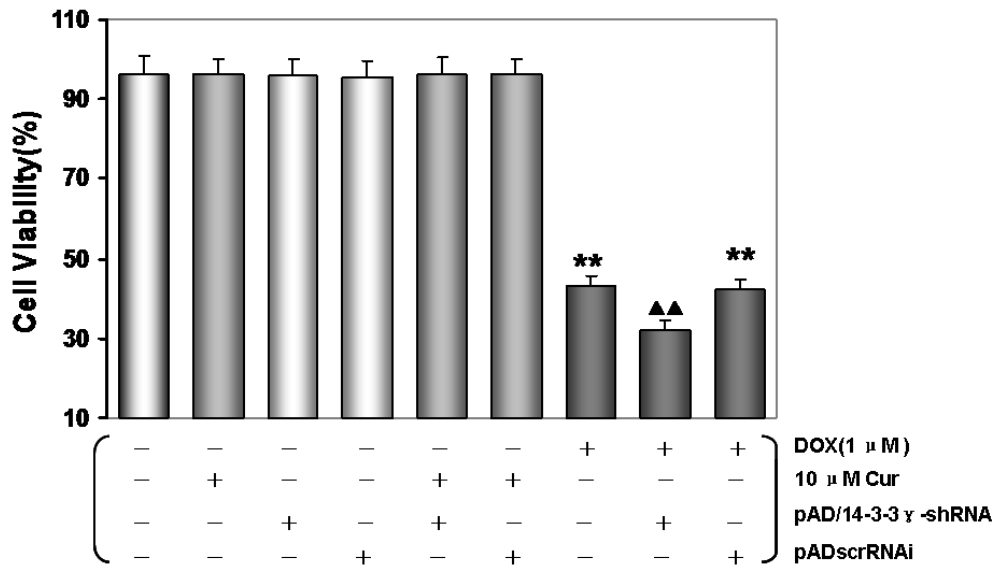

Fig. S1

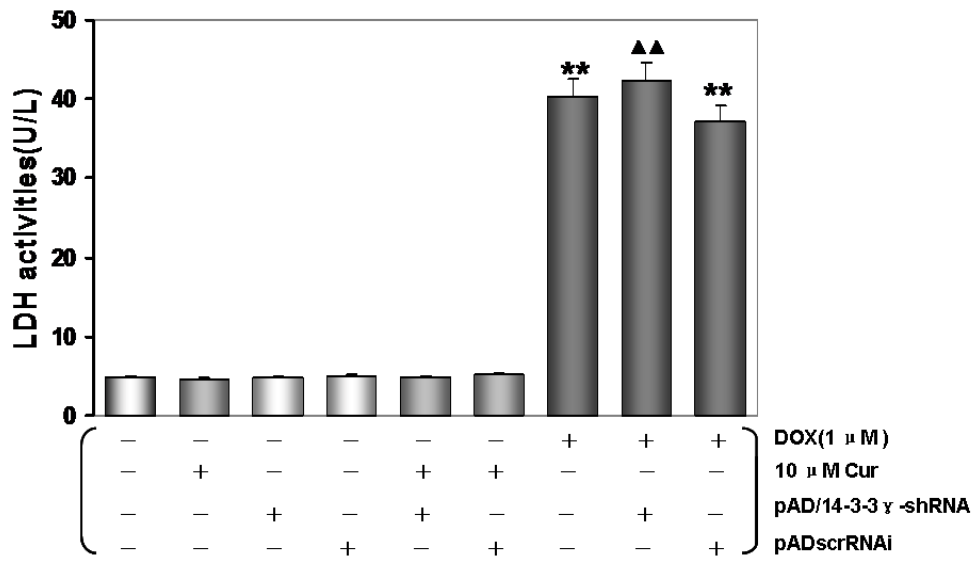

Fig. S2

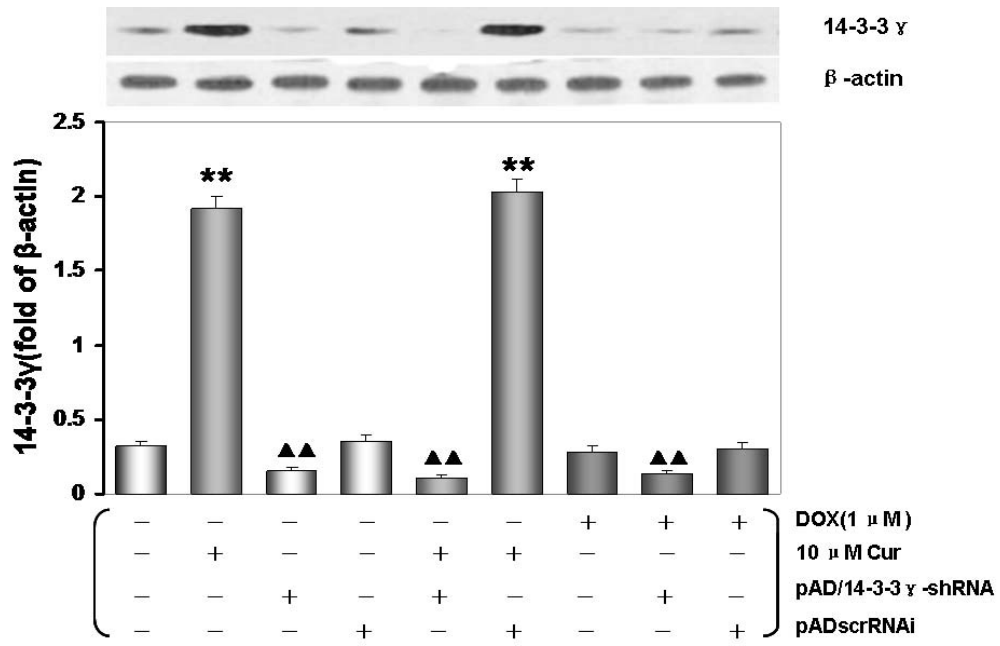

Fig. S3

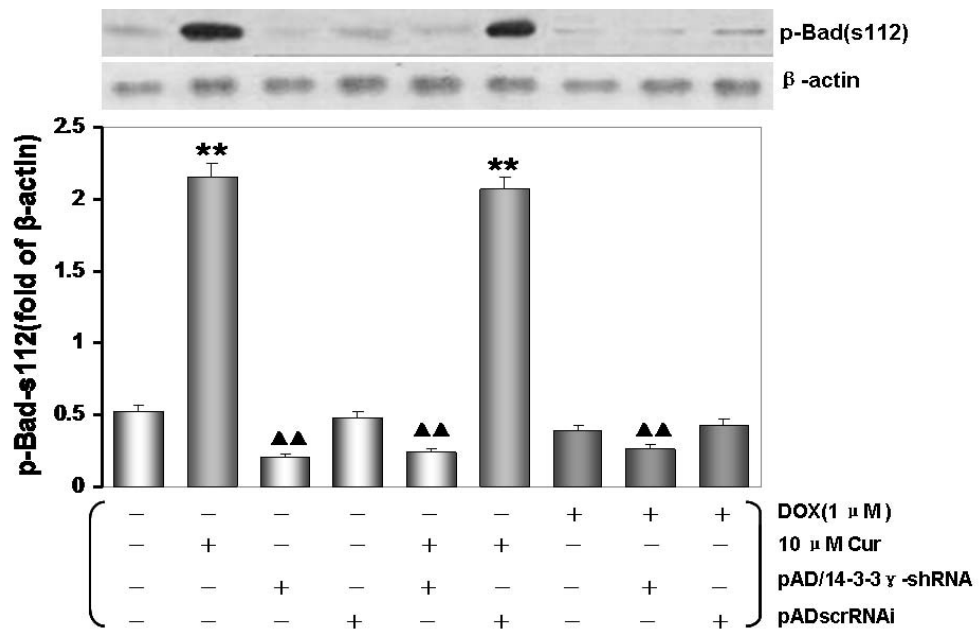

Fig. S4
